# Supplementary material for: Antioxidant Guided Fractionation of Blackberry Polyphenols Show Synergistic Role of Catechins and Ellagitannins
Source: MDPI journal article supplement (doi:10.3390/molecules28041933), 2023-02-17
Supplement: s1 [file s1]

# Antioxidant guided fractionation of blackberry polyphenols show synergistic role of catechins and ellagitannins

Katerina Tzima<sup>1</sup>, Gontorn Putsakum<sup>1</sup> and Dilip K. Rai<sup>1\*</sup>

<sup>1</sup> Teagasc Food Research Centre, Ashtown, Dublin D15KN3K, Ireland

\* Correspondence: [dilip.raai@teagasc.ie](mailto:dilip.raai@teagasc.ie); Tel.: +353 (0)18059569

## Supplementary Materials:

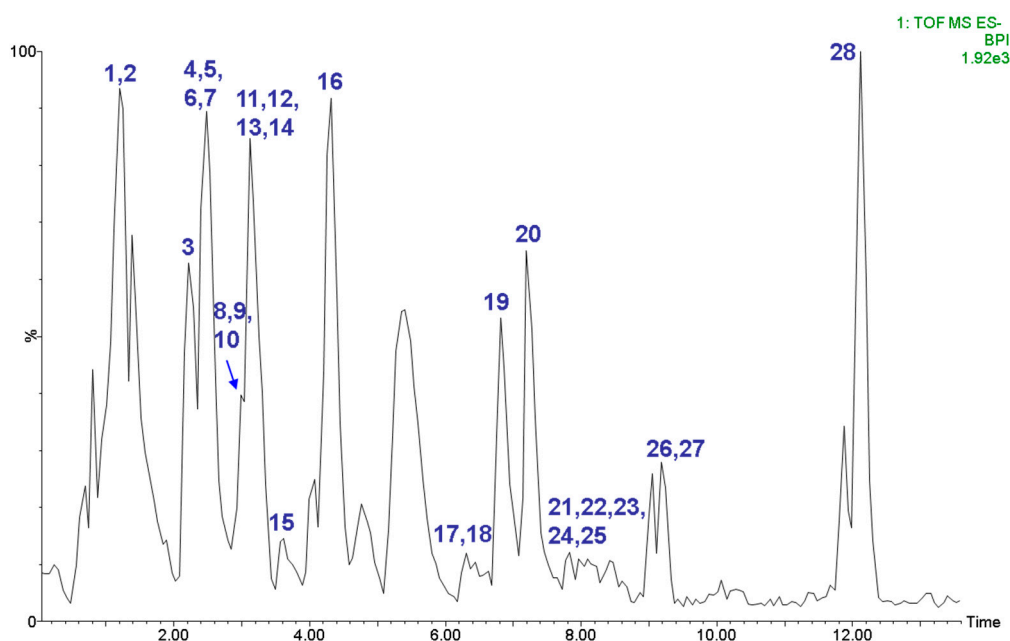

**Citation:** Lastname, F.; Lastname, F.; Lastname, F. Title. *Nutrients* **2023**, *28*, 1933. <https://doi.org/10.3390/molecules28041933>

Academic Editor: Firstname Last-name

Received: date

Accepted: date

Published: 17 February 2023

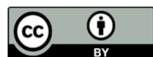

**Copyright:** © 2023 by the authors. Licensee MDPI, Basel, Switzerland. This article is an open access article distributed under the terms and conditions of the Creative Commons Attribution (CC BY) license (<https://creativecommons.org/licenses/by/4.0/>).

**Figure S1.** Representative base peak intensity (BPI) chromatogram of phenolic rich blackberry crude extract. Peak 1) Gallic acid, 2) Neochlorogenic acid, 3) Catechin, 4) Protocatechuic acid, 5) Dihydromyricetin rhamnoside, 6) Cyanidin-3-*O*-glucoside, 7) Cyanidin-3-*O*-rutinoside, 8) Procyanidin trimer C type, 9) 3-*p*-Coumaroylquinic acid, 10) Procyanthocyanidin type, 11) Cyanidin-3-*O*-sophoroside, 12) Procyanidin B2, 13) Cinnamtannin A2, 14) 3-Feruloylquinic acid, 15) Procyanidin trimer C type, 16) Epicatechin, 17) Rutin, 18) Epigallocatechin, 19) Lambertianin C isomer, 20) Sanguin H-6/Lambertianin A, 21) Ellagic acid pentoside, 22) Ellagic acid, 23) Quercetin-3-*O*-galactoside, 24) Quercetin-3-*O*-glucoside, 25) Quercetin-3-*O*-hexoside, 26) Quercetin-3-pentoside, 27) Kaempferol-3-*O*-rutinoside and 28) Quercetin.

**Table S1.** Retention time ( $t_R$ ), MRM transitions, collision energy and cone voltage for the standards used and the phenolic compounds that were quantified in the different fractions of the phenolic-rich blackberry extract <sup>1,2</sup>.

| Reference Compound                 | $t_R$<br>(min.) | MRM Transition<br>( $m/z$ )  | Cone Voltage<br>(V) | Collision Energy<br>(eV) |
|------------------------------------|-----------------|------------------------------|---------------------|--------------------------|
| Protocatechuic acid                | 2.59            | 153.06 → 108.94<br>→ 80.88   | 29                  | 16<br>18                 |
| Cyanidin-3- <i>O</i> -glucoside    | 3.60            | 448.61 → 287.20<br>→ 316.60  | 30                  | 15<br>15                 |
| Cyanidin-3- <i>O</i> -rutinoside   | 3.70            | 594.92 → 286.80<br>→ 449.20  | 30                  | 20<br>20                 |
| Cyanidin-3,5-sophoside             | 3.72            | 611.16 → 285.10<br>→ 475.20  | 55                  | 24<br>35                 |
| Cinamtannin A2                     | 3.75            | 1155.12 → 577.32<br>→ 984.45 | 40                  | 40<br>40                 |
| Procyanidin B2                     | 3.76            | 577.30 → 288.94<br>→ 406.90  | 55                  | 26<br>28                 |
| Epicatechin                        | 4.08            | 289.24 → 244.95<br>→ 202.74  | 47                  | 14<br>16                 |
| Lambertianin C                     | 4.45            | 1401.87 → 300.09<br>→ 632.61 | 65                  | 35<br>35                 |
| Sanguin H-6 <sup>2</sup>           | 4.78            | 633.44 → 300.93<br>→ 275.28  | 55                  | 27<br>27                 |
| Ellagic acid                       | 5.56            | 301.04 → 283.88<br>→ 144.88  | 60                  | 28<br>36                 |
| Rutin                              | 5.70            | 609.38 → 300.20<br>→ 271.00  | 60                  | 34<br>60                 |
| Quercetin-3- <i>O</i> -galactoside | 6.07            | 463.19 → 300.27<br>→ 270.95  | 57                  | 22<br>44                 |
| Quercetin-3- <i>O</i> -glucoside   | 6.42            | 463.19 → 300.27<br>→ 270.95  | 57                  | 22<br>44                 |
| Quercetin-3- <i>O</i> -hexoside    | 7.13            | 463.19 → 300.27<br>→ 270.95  | 57                  | 22<br>44                 |
| Kaempferol-3- <i>O</i> -rutinoside | 7.23            | 593.19 → 284.77<br>→ 254.98  | 60                  | 34<br>60                 |
| Quercetin                          | 8.16            | 301.27 → 150.94<br>→ 120.95  | 47                  | 20<br>32                 |

<sup>1</sup> The first MRM transition ( $m/z$ ) constitutes the quantifier and the second the qualifier. <sup>2</sup> Sanguin H-6 A was quantified using the transitions of Galloyl-HHPD glucose isomer, which is a dominant fragment of the compound.

**Disclaimer/Publisher's Note:** The statements, opinions and data contained in all publications are solely those of the individual author(s) and contributor(s) and not of MDPI and/or the editor(s). MDPI and/or the editor(s) disclaim responsibility for any injury to people or property resulting from any ideas, methods, instructions or products referred to in the content.
